# Supplementary material for: A New Molecular Detection System for Canine Distemper Virus Based on a Double-Check Strategy
Source: MDPI journal article supplement (doi:10.3390/v13081632), 2021-08-18
Supplement: s1 [file s1]

---

*Supplementary material*

# A New Molecular Detection System for Canine Distemper Virus Based on a Double-Check Strategy

Sabrina Halecker<sup>1,†</sup>, Sabine Bock<sup>2</sup>, Martin Beer<sup>1</sup>, Bernd Hoffmann<sup>1\*</sup>

<sup>1</sup>Institute of Diagnostic Virology, Friedrich-Loeffler-Institut, Federal Research Institute for Animal Health, Südufer 10, 17493 Greifswald-Insel Riems, Germany

<sup>2</sup>Landeslabor Berlin-Brandenburg, Gerhard-Neumann-Str. 2, 15236 Frankfurt (Oder), Germany.

<sup>†</sup>current adress: Institute of Virology, Freie Universität Berlin, Robert von Ostertag-Straße 7-13, 14163 Berlin, Germany

\* Correspondence: Bernd.Hoffmann@fli.de, Tel.: +49 38351 7 1506

---

**Table S1** Comparative test series on initial 13 CDV RT-qPCR assays carried out with AgPath-ID™ One-Step RT-PCR Reagents and based on a log10 dilutional series ( $10^{-1}$  to  $10^{-8}$ ) of the CDV strain “Onderstepoort” (sample ID: BH 04/18-2) by contrast with the ELIA-Mix, location within the genome are shown for each single CDV RT-qPCR assay, results are shown in Cq values

| location:              | N gene   | P gene    |           |           |           |           |           |           |            |            | L gene     |            |            |            |
|------------------------|----------|-----------|-----------|-----------|-----------|-----------|-----------|-----------|------------|------------|------------|------------|------------|------------|
|                        | ELIA-Mix | CDV-Mix 3 | CDV-Mix 4 | CDV-Mix 5 | CDV-Mix 6 | CDV-Mix 7 | CDV-Mix 8 | CDV-Mix 9 | CDV-Mix 10 | CDV-Mix 11 | CDV-Mix 12 | CDV-Mix 13 | CDV-Mix 14 | CDV-Mix 15 |
| <b>10<sup>-1</sup></b> | 21.4     | 19.7      | 19.6      | 19.2      | 19.1      | 18.6      | 19.4      | 19.5      | 19.2       | 19.6       | 20.1       | 19.8       | 19.2       | 18.9       |
| <b>10<sup>-2</sup></b> | 24.3     | 23.0      | 23.1      | 22.4      | 22.5      | 22.1      | 22.7      | 23.0      | 22.5       | 22.6       | 23.4       | 23.1       | 22.5       | 22.3       |
| <b>10<sup>-3</sup></b> | 28.0     | 26.4      | 26.5      | 25.7      | 26.0      | 25.2      | 26.1      | 26.2      | 25.7       | 26.0       | 26.3       | 26.5       | 25.8       | 25.7       |
| <b>10<sup>-4</sup></b> | 31.6     | 29.7      | 30.0      | 29.1      | 29.3      | 28.7      | 29.4      | 29.6      | 29.1       | 29.1       | 29.4       | 30.1       | 29.2       | 29.1       |
| <b>10<sup>-5</sup></b> | 35.8     | 33.0      | 33.5      | 32.7      | 32.6      | 32.2      | 32.6      | 33.2      | No Cq      | 35.1       | 34.5       | 33.3       | 32.7       | 32.2       |
| <b>10<sup>-6</sup></b> | 39.3     | 35.0      | 36.1      | 36.8      | 35.5      | 35.0      | 37.5      | 36.4      | No Cq      | No Cq      | No Cq      | 39.2       | 34.9       | 36.5       |
| <b>10<sup>-7</sup></b> | No Cq    | No Cq     | No Cq     | No Cq     | No Cq     | No Cq     | No Cq     | 39.0      | No Cq      | No Cq      | No Cq      | No Cq      | 38.2       | 38.2       |
| <b>10<sup>-8</sup></b> | No Cq    | No Cq     | No Cq     | No Cq     | No Cq     | No Cq     | No Cq     | No Cq     | No Cq      | No Cq      | No Cq      | No Cq      | No Cq      | No Cq      |

RT-qPCR = reverse transcriptase quantitative polymerase chain reaction, CDV = canine distemper virus, ID = ident number; Cq = quantification cyler

**Table S2** Comparative test series on initial 13 CDV RT-qPCR assays carried out on the Bio-Rad CFX96™ Real-Time PCR Detection System and based on a log10 dilutional series ( $10^{-1}$  to  $10^{-8}$ ) of the CDV strain “Onderstepoort” (sample ID: BH 04/18-2) by contrast with the ELIA-Mix, results are shown in RFU values

| location: | N gene   | P gene    |           |           |           |           |           |           |            |            | L gene     |            |            |            |
|-----------|----------|-----------|-----------|-----------|-----------|-----------|-----------|-----------|------------|------------|------------|------------|------------|------------|
|           | ELIA-Mix | CDV-Mix 3 | CDV-Mix 4 | CDV-Mix 5 | CDV-Mix 6 | CDV-Mix 7 | CDV-Mix 8 | CDV-Mix 9 | CDV-Mix 10 | CDV-Mix 11 | CDV-Mix 12 | CDV-Mix 13 | CDV-Mix 14 | CDV-Mix 15 |
| $10^{-1}$ | 4955     | 4916      | 4404      | 5894      | 3914      | 6209      | 5731      | 6011      | 3282       | 3625       | 5749       | 6807       | 5836       | 6351       |
| $10^{-2}$ | 5179     | 5995      | 4429      | 6144      | 3830      | 6628      | 6040      | 6236      | 2994       | 3285       | 5080       | 6997       | 6354       | 6780       |
| $10^{-3}$ | 5216     | 5481      | 4211      | 6054      | 3815      | 6766      | 5886      | 6090      | 2201       | 2883       | 3943       | 7029       | 6238       | 6775       |
| $10^{-4}$ | 4960     | 5280      | 3734      | 6028      | 3171      | 6216      | 5561      | 6246      | 1138       | 1839       | 2434       | 6709       | 5794       | 6055       |
| $10^{-5}$ | 4093     | 4623      | 2534      | 5316      | 2367      | 5254      | 4530      | 5197      | 26         | 694        | 874        | 5772       | 4088       | 6074       |
| $10^{-6}$ | 2784     | 3924      | 1062      | 3897      | 1840      | 4105      | 2299      | 3562      | -2         | 47         | 44         | 3882       | 3285       | 4678       |
| $10^{-7}$ | 28       | 11        | 16        | 16        | 22        | 15        | 9         | 3576      | 6          | 29         | 24         | 39         | 1468       | 4009       |
| $10^{-8}$ | 20       | 207       | 21        | 12        | 192       | 26        | -5        | 13        | 26         | 12         | 7          | 8          | 23         | 24         |

RT-qPCR = reverse transcriptase quantitative polymerase chain reaction, CDV = canine distemper virus, ID = ident number; RFU = relative fluorescence unit

**Table S3** Test series on the exclusivity and inclusivity of five preselected CDV RT-qPCR assays using different isolates of the four lineages of PPRV (L1 to L4), MV and *Cetacean morbilliviruses* (CeMV), test series carried out with isolates of representatives of paramyxoviruses (NDV, Nipah virus, Hendra virus and BPIV-3) were negative for all five CDV-mixes (not shown here)

| CDV-Mix No. | PPRV                |                   |               |                       |                     | MV     |               | PDV   |       | CeMV  |       |
|-------------|---------------------|-------------------|---------------|-----------------------|---------------------|--------|---------------|-------|-------|-------|-------|
|             | Ivory Coast/89 (L1) | Nigeria 75/1 (L2) | Sudan/72 (L3) | India/Shahjadpur (L4) | Kurdistan/2011 (L4) | MV Mor | MeV Anchorage | PDV   | PDV   | PMV   | DMV   |
| 3           | No Cq               | No Cq             | No Cq         | No Cq                 | No Cq               | No Cq  | No Cq         | No Cq | No Cq | No Cq | No Cq |
| 5           | No Cq               | No Cq             | No Cq         | No Cq                 | No Cq               | No Cq  | No Cq         | No Cq | No Cq | No Cq | No Cq |
| 7           | No Cq               | No Cq             | No Cq         | No Cq                 | No Cq               | No Cq  | No Cq         | No Cq | No Cq | No Cq | No Cq |
| 9           | No Cq               | No Cq             | No Cq         | No Cq                 | No Cq               | No Cq  | No Cq         | 35.1  | 31.0  | No Cq | No Cq |
| 15          | 36.0                | 33.7              | 25.1          | 27.1                  | 31.2                | No Cq  | 31.9          | No Cq | No Cq | No Cq | 34.5  |

CDV = canine distemper virus, RT-qPCR = reverse transcriptase quantitative polymerase chain reaction, PPRV = peste des petits ruminants virus, MV = measles virus, NDV = Newcastle disease virus, BPIV-3 = bovine parainfluenza virus 3, PDV = phocine distemper virus, PMV = porpoise morbillivirus, DMV = dolphin morbillivirus

**Table S4** Validation data of positive samples carried out by the one-step RT-qPCR for CDV detection

| Sample ID    | Geographical origin |               |              | Year*   | host           | material | Cq values of RT-qPCR |             |  |
|--------------|---------------------|---------------|--------------|---------|----------------|----------|----------------------|-------------|--|
|              | Country             | Federal state | CDV<br>Mix 3 |         |                |          | CDV<br>Mix 7         | ELIA<br>Mix |  |
|              |                     |               |              |         |                |          |                      |             |  |
| BH 75/18-1A  | Germany             | Hesse         | -            | Fox     | homogenate     | 24.4     | 23.8                 | 22.3        |  |
| BH 75/18-2A  | Germany             | Hesse         | -            | Fox     | homogenate     | 29.4     | 29.2                 | 27.2        |  |
| BH 75/18-4A  | Germany             | Hesse         | -            | Fox     | homogenate     | 26.7     | 26.0                 | 27.2        |  |
| BH 75/18-5A  | Germany             | Hesse         | -            | Fox     | homogenate     | 28.2     | 28.1                 | 29.6        |  |
| BH 75/18-7A  | Germany             | Hesse         | -            | Fox     | homogenate     | 30.0     | 29.2                 | 31.7        |  |
| BH 75/18-9A  | Germany             | Hesse         | -            | Fox     | homogenate     | 21.8     | 22.5                 | 21.1        |  |
| BH 75/18-14A | Germany             | Hesse         | -            | Fox     | homogenate     | 24.6     | 24.9                 | 25.9        |  |
| BH 75/18-10A | Germany             | Hesse         | -            | Fox     | homogenate     | 21.6     | 21.9                 | 19.3        |  |
| BH 75/18-15A | Germany             | Hesse         | -            | Fox     | homogenate     | 20.1     | 20.7                 | 18.5        |  |
| BH 75/18-12A | Germany             | Hesse         | -            | Fox     | homogenate     | 27.1     | 27.1                 | 26.2        |  |
| BH 24/18-6   | Germany             | Lower Saxony  | 2016         | Fox     | organ grinding | 30.0     | 29.3                 | 27.3        |  |
| BH 24/18-13  | Germany             | Berlin        | 2012         | red fox | organ grinding | 26.1     | 26.0                 | 24.6        |  |
| BH 75/18-1B  | Germany             | Hesse         | -            | Fox     | brain          | 29.7     | 30.3                 | 28.8        |  |
| BH 75/18-2B  | Germany             | Hesse         | -            | Fox     | brain          | 25.2     | 24.4                 | 23.1        |  |
| BH 75/18-9B  | Germany             | Hesse         | -            | Fox     | brain          | 25.0     | 25.0                 | 23.2        |  |
| BH 75/18-14B | Germany             | Hesse         | -            | Fox     | brain          | 19.6     | 19.4                 | 18.1        |  |
| BH 75/18-10B | Germany             | Hesse         | -            | Fox     | brain          | 27.5     | 27.0                 | 26.2        |  |
| BH 75/18-15B | Germany             | Hesse         | -            | Fox     | brain          | 27.1     | 27.2                 | 26.0        |  |
| BH 75/18-12B | Germany             | Hesse         | -            | Fox     | brain          | 30.6     | 30.6                 | 30.1        |  |
| BH 24/18-2   | Germany             | Saxony-Anhalt |              | red fox | brain          | 26.1     | 25.3                 | 24.6        |  |
| BH 75/18-1C  | Germany             | Hesse         | -            | Fox     | lung           | 22.2     | 23.5                 | 20.2        |  |
| BH 75/18-2C  | Germany             | Hesse         | -            | Fox     | lung           | 30.1     | 31.0                 | 28.6        |  |
| BH 75/18-9C  | Germany             | Hesse         | -            | Fox     | lung           | 21.6     | 23.3                 | 20.1        |  |
| BH 75/18-14C | Germany             | Hesse         | -            | Fox     | lung           | 24.2     | 25.7                 | 22.6        |  |
| BH 75/18-10C | Germany             | Hesse         | -            | Fox     | lung           | 24.8     | 25.2                 | 22.4        |  |
| BH 75/18-15C | Germany             | Hesse         | -            | Fox     | lung           | 22.8     | 22.8                 | 20.0        |  |
| BH 75/18-12C | Germany             | Hesse         | -            | Fox     | lung           | 25.8     | 26.7                 | 24.0        |  |
| BH 75/18-1D  | Germany             | Hesse         | -            | Fox     | liver          | 25.1     | 26.5                 | 23.7        |  |
| BH 75/18-2D  | Germany             | Hesse         | -            | Fox     | liver          | 36.2     | 36.1                 | 34.1        |  |
| BH 75/18-9D  | Germany             | Hesse         | -            | Fox     | liver          | 25.3     | 25.8                 | 23.3        |  |
| BH 75/18-14D | Germany             | Hesse         | -            | Fox     | liver          | 26.4     | 28.0                 | 25.3        |  |
| BH 75/18-10D | Germany             | Hesse         | -            | Fox     | liver          | 26.5     | 26.1                 | 23.4        |  |
| BH 75/18-15D | Germany             | Hesse         | -            | Fox     | liver          | 27.2     | 26.2                 | 24.2        |  |
| BH 75/18-12D | Germany             | Hesse         | -            | Fox     | liver          | 35.8     | 36.7                 | 34.3        |  |
| BH 75/18-1E  | Germany             | Hesse         | -            | Fox     | lymph node     | 20.3     | 21.6                 | 18.3        |  |
| BH 75/18-2E  | Germany             | Hesse         | -            | Fox     | lymph node     | 29.9     | 31.1                 | 28.2        |  |
| BH 75/18-9E  | Germany             | Hesse         | -            | fox     | lymph node     | 17.0     | 17.7                 | 14.6        |  |
| BH 75/18-14E | Germany             | Hesse         | -            | fox     | lymph node     | 21.6     | 22.8                 | 20.3        |  |
| BH 75/18-10E | Germany             | Hesse         | -            | fox     | lymph node     | 19.8     | 19.1                 | 16.1        |  |

|              |         |             |      |              |                |      |      |      |
|--------------|---------|-------------|------|--------------|----------------|------|------|------|
| BH 75/18-15E | Germany | Hesse       | -    | fox          | lymph node     | 18.6 | 18.5 | 15.0 |
| BH 75/18-12E | Germany | Hesse       | -    | fox          | lymph node     | 31.0 | 32.0 | 29.4 |
| BH 75/18-1F  | Germany | Hesse       | -    | fox          | kidney         | 27.9 | 28.3 | 26.8 |
| BH 75/18-2F  | Germany | Hesse       | -    | fox          | kidney         | 36.1 | 36.0 | 36.1 |
| BH 75/18-9F  | Germany | Hesse       | -    | fox          | kidney         | 24.4 | 25.2 | 23.0 |
| BH 75/18-14F | Germany | Hesse       | -    | fox          | kidney         | 28.3 | 29.7 | 27.9 |
| BH 75/18-10F | Germany | Hesse       | -    | fox          | kidney         | 25.2 | 24.3 | 22.6 |
| BH 75/18-15F | Germany | Hesse       | -    | fox          | kidney         | 24.4 | 25.0 | 22.8 |
| BH 75/18-12F | Germany | Hesse       | -    | fox          | kidney         | 31.3 | 32.9 | 31.6 |
| BH 24/18-4   | Germany | Thuringia   | 2014 | red fox      | spleen         | 30.1 | 29.0 | 27.8 |
| BH 75/18-3A  | Germany | Hesse       | -    | raccoon      | homogenate     | 31.9 | 31.4 | 33.4 |
| BH 75/18-6A  | Germany | Hesse       | -    | raccoon      | homogenate     | 31.5 | 32.1 | 32.0 |
| BH 75/18-8A  | Germany | Hesse       | -    | raccoon      | homogenate     | 25.0 | 25.0 | 23.5 |
| BH 75/18-11A | Germany | Hesse       | -    | raccoon      | homogenate     | 28.2 | 28.5 | 28.3 |
| BH 75/18-13A | Germany | Hesse       | -    | raccoon      | homogenate     | 26.3 | 27.7 | 27.5 |
| BH 24/18-5   | Germany | Hesse       | -    | raccoon      | organ grinding | 24.2 | 23.1 | 21.5 |
| BH 75/18-6B  | Germany | Hesse       | -    | raccoon      | brain          | 26.8 | 27.5 | 26.4 |
| BH 75/18-8B  | Germany | Hesse       | -    | raccoon      | brain          | 23.9 | 24.0 | 22.3 |
| BH 75/18-11B | Germany | Hesse       | -    | raccoon      | brain          | 23.2 | 22.6 | 22.9 |
| BH 75/18-13B | Germany | Hesse       | -    | raccoon      | brain          | 23.0 | 23.1 | 22.1 |
| BH 75/18-6C  | Germany | Hesse       | -    | raccoon      | lung           | 34.8 | 34.9 | 33.8 |
| BH 75/18-8C  | Germany | Hesse       | -    | raccoon      | lung           | 21.0 | 21.3 | 19.4 |
| BH 75/18-11C | Germany | Hesse       | -    | raccoon      | lung           | 26.0 | 26.1 | 24.5 |
| BH 75/18-13C | Germany | Hesse       | -    | raccoon      | lung           | 31.3 | 32.7 | 31.1 |
| BH 75/18-6D  | Germany | Hesse       | -    | raccoon      | liver          | 32.9 | 33.5 | 31.9 |
| BH 75/18-8D  | Germany | Hesse       | -    | raccoon      | liver          | 25.2 | 25.2 | 22.9 |
| BH 75/18-11D | Germany | Hesse       | -    | raccoon      | liver          | 28.8 | 29.5 | 28.1 |
| BH 75/18-13D | Germany | Hesse       | -    | raccoon      | liver          | 38.4 | 37.7 | 38.1 |
| BH 75/18-6E  | Germany | Hesse       | -    | raccoon      | lymph node     | 38.2 | 38.3 | 37.3 |
| BH 75/18-8E  | Germany | Hesse       | -    | raccoon      | lymph node     | 22.6 | 23.1 | 20.7 |
| BH 75/18-11E | Germany | Hesse       | -    | raccoon      | lymph node     | 24.8 | 25.6 | 22.6 |
| BH 75/18-13E | Germany | Hesse       | -    | raccoon      | lymph node     | 34.8 | 36.5 | 33.8 |
| BH 75/18-6F  | Germany | Hesse       | -    | raccoon      | kidney         | 37.1 | 37.3 | 37.7 |
| BH 75/18-8F  | Germany | Hesse       | -    | raccoon      | kidney         | 21.0 | 21.2 | 19.4 |
| BH 75/18-11F | Germany | Hesse       | -    | raccoon      | kidney         | 28.2 | 28.9 | 27.4 |
| BH 75/18-13F | Germany | Hesse       | -    | raccoon      | kidney         | 33.5 | 34.8 | 33.1 |
| BH 24/18-12  | Germany | Brandenburg | 2007 | stone marten | organ grinding | 32.6 | 31.0 | 35.3 |
| BH 24/18-11  | Germany | Brandenburg | 2003 | dog          | brain          | 27.5 | 26.8 | 26.3 |
| BH 65/18-2   | Austria | -           | 2018 | fox          | organ pool     | 32.0 | 32.1 | 31.1 |
| BH 65/18-4   | Austria | -           | 2018 | Fox          | organ pool     | 29.8 | 30.2 | 28.6 |
| BH 65/18-5   | Austria | -           | 2018 | Fox          | brain          | 28.7 | 28.3 | 27.2 |
| BH 24/18-7   | Austria | -           | 2008 | Fox          | organ grinding | 29.7 | 28.0 | 27.5 |

|                    |         |   |             |                |                       |             |             |             |
|--------------------|---------|---|-------------|----------------|-----------------------|-------------|-------------|-------------|
| BH 24/18-8         | Austria | - | 2008        | Fox            | organ grinding        | 26.4        | 23.9        | 22.9        |
| BH 24/18-9         | Austria | - | 2010        | marten         | organ grinding        | 27.8        | 27.1        | 24.2        |
| BH 36/19-2         | Italy   | - | -           | -              | -                     | 15.5        | 16.7        | 14.8        |
| BH 24/18-10        | Romania | - | 2016        | Dog            | organ grinding        | 30.0        | 28.3        | 28.1        |
| BH 36/19-3         | Spain   | - | -           | -              | -                     | 32.0        | 31.9        | 30.4        |
| BH 36/19-1         | Ukraine | - | -           | -              | -                     | 13.4        | 15.0        | 13.0        |
| BH 65/18-6         | Africa  | - | 2018        | Dog            | FFPE                  | No Cq       | No Cq       | 36.9        |
| BH 105/15-1        | -       | - | -           | -              | -                     | 21.0        | 18.2        | 19.4        |
| BH 105/15-2        | -       | - | -           | -              | -                     | 11.7        | 11.0        | 12.3        |
| BH 04/18-2         | -       | - | -           | -              | -                     | 17.1        | 15.8        | 17.4        |
| BH 24/18-3         | -       | - | 1995        | -              | -                     | 22.2        | 20.8        | 22.5        |
| BH 76/18-14        | -       | - | 2012        | red fox        | organ grinding        | No Cq       | No Cq       | 37.5        |
| BH 76/18-11        | -       | - | 2012        | red fox        | organ grinding        | 33.6        | 34.1        | 34.9        |
| BH 76/18-13        | -       | - | 2012        | red fox        | organ grinding        | 25.3        | 25.1        | 25.3        |
| BH 76/18-41        | -       | - | 2013        | red fox        | organ grinding        | 21.5        | 22.4        | 20.5        |
| BH 76/18-7         | -       | - | 2013        | red fox        | organ grinding        | 25.0        | 25.5        | 23.4        |
| BH 76/18-22        | -       | - | 2013        | red fox        | organ grinding        | 35.3        | 35.1        | 36.4        |
| BH 76/18-6         | -       | - | 2013        | red fox        | organ grinding        | 23.0        | 23.8        | 21.4        |
| BH 76/18-10        | -       | - | 2012        | red fox        | organ grinding        | 37.3        | 36.7        | 34.8        |
| BH 76/18-23        | -       | - | 2013        | red fox        | organ grinding        | 33.5        | 34.8        | 33.4        |
| BH 76/18-38        | -       | - | 2013        | red fox        | organ grinding        | 30.0        | 30.1        | 29.1        |
| BH 76/18-28        | -       | - | 2013        | red fox        | organ grinding        | 32.4        | 32.6        | 32.6        |
| BH 76/18-25        | -       | - | 2013        | red fox        | organ grinding        | 32.6        | 32.9        | 33.0        |
| BH 76/18-29        | -       | - | 2013        | red fox        | organ grinding        | 28.9        | 28.9        | 29.1        |
| BH 76/18-47        | -       | - | 2013        | red fox        | organ grinding        | 29.2        | 29.2        | 29.0        |
| BH 76/18-73        | -       | - | 2016        | red fox        | organ grinding        | 25.8        | 25.8        | 25.2        |
| BH 76/18-83        | -       | - | 2016        | red fox        | organ grinding        | 30.2        | 31.6        | 32.1        |
| BH 76/18-84        | -       | - | 2016        | red fox        | organ grinding        | 26.2        | 28.5        | 27.8        |
| BH 76/18-87        | -       | - | 2016        | red fox        | organ grinding        | 24.5        | 25.1        | 24.3        |
| BH 76/18-88        | -       | - | 2016        | red fox        | organ grinding        | 30.6        | 31.8        | 30.1        |
| <b>BH 76/18-93</b> | -       | - | <b>2016</b> | <b>red fox</b> | <b>organ grinding</b> | <b>23.9</b> | <b>28.3</b> | <b>31.6</b> |
| <b>BH 76/18-94</b> | -       | - | <b>2016</b> | <b>red fox</b> | <b>organ grinding</b> | <b>21.1</b> | <b>24.7</b> | <b>29.6</b> |
| BH 76/18-82        | -       | - | 2016        | red fox        | organ grinding        | 25.5        | 26.2        | 24.5        |
| BH 76/18-2         | -       | - | 2007        | red fox        | brain                 | 27.1        | 27.0        | 27.2        |
| BH 76/18-3         | -       | - | 2008        | red fox        | brain                 | 24.4        | 24.1        | 25.9        |
| BH 76/18-4         | -       | - | 2009        | red fox        | brain                 | 24.4        | 24.1        | 24.8        |
| BH 76/18-21        | -       | - | 2012        | red fox        | brain                 | 27.4        | 26.7        | 27.5        |
| BH 76/18-15        | -       | - | 2012        | red fox        | brain                 | 28.3        | 27.9        | 29.0        |
| BH 76/18-9         | -       | - | 2013        | red fox        | brain                 | 26.7        | 26.7        | 26.5        |
| BH 76/18-24        | -       | - | 2013        | red fox        | brain                 | 25.2        | 25.6        | 25.6        |
| BH 76/18-55        | -       | - | 2013        | red fox        | brain                 | 27.0        | 27.6        | 27.9        |
| BH 76/18-61        | -       | - | 2013        | red fox        | brain                 | 24.6        | 24.4        | 24.5        |

---

|              |   |   |      |         |                |      |      |      |
|--------------|---|---|------|---------|----------------|------|------|------|
| BH 76/18-126 | - | - | 2018 | red fox | brain          | 32.8 | 33.7 | 33.8 |
| BH 76/18-127 | - | - | 2018 | red fox | brain          | 35.2 | 36.8 | 35.3 |
| BH 76/18-136 | - | - | 2018 | red fox | brain          | 34.2 | 35.2 | 34.8 |
| BH 76/18-142 | - | - | 2018 | red fox | brain          | 26.4 | 27.4 | 26.7 |
| BH 76/18-143 | - | - | 2018 | red fox | brain          | 30.4 | 30.8 | 31.1 |
| BH 76/18-158 | - | - | 2018 | red fox | brain          | 31.5 | 32.4 | 32.5 |
| BH 76/18-161 | - | - | 2018 | red fox | brain          | 22.8 | 22.3 | 23.1 |
| BH 76/18-162 | - | - | 2018 | red fox | brain          | 37.1 | 38.5 | 36.8 |
| BH 76/18-184 | - | - | 2018 | red fox | brain          | 36.7 | 36.8 | 35.8 |
| BH 76/18-210 | - | - | 2018 | red fox | brain          | 37.4 | 38.3 | 37.7 |
| BH 76/18-90B | - | - | 2016 | red fox | brain          | 33.1 | 33.4 | 32.7 |
| BH 76/18-91B | - | - | 2016 | red fox | brain          | 29.0 | 29.2 | 28.4 |
| BH 76/18-92B | - | - | 2016 | red fox | brain          | 26.5 | 27.1 | 25.2 |
| BH 76/18-93B | - | - | 2016 | red fox | brain          | 25.0 | 25.1 | 23.6 |
| BH 76/18-94B | - | - | 2016 | red fox | brain          | 25.2 | 25.3 | 24.1 |
| BH 76/18-97B | - | - | 2008 | red fox | brain          | 21.2 | 21.1 | 23.3 |
| BH 76/18-98B | - | - | 2008 | red fox | brain          | 22.4 | 23.1 | 25.8 |
| BH 76/18-75  | - | - | 2016 | red fox | lung           | 22.1 | 23.1 | 20.3 |
| BH 76/18-103 | - | - | 2018 | red fox | lung           | 23.0 | 24.4 | 23.2 |
| BH 76/18-77  | - | - | 2016 | red fox | spleen         | 22.2 | 23.3 | 21.3 |
| BH 76/18-78  | - | - | 2016 | red fox | spleen         | 21.7 | 22.4 | 20.2 |
| BH 76/18-79  | - | - | 2016 | red fox | spleen         | 22.0 | 23.2 | 21.0 |
| BH 76/18-80  | - | - | 2016 | red fox | spleen         | 22.1 | 23.0 | 21.9 |
| BH 76/18-18  | - | - | 2012 | raccoon | organ grinding | 20.8 | 21.5 | 25.3 |
| BH 76/18-17  | - | - | 2012 | raccoon | organ grinding | 19.6 | 20.6 | 19.0 |
| BH 76/18-5   | - | - | 2013 | raccoon | organ grinding | 16.8 | 17.2 | 15.4 |
| BH 76/18-44  | - | - | 2013 | raccoon | organ grinding | 21.2 | 22.2 | 20.3 |
| BH 76/18-45  | - | - | 2013 | raccoon | organ grinding | 18.6 | 20.0 | 17.7 |
| BH 76/18-46  | - | - | 2013 | raccoon | organ grinding | 22.1 | 24.0 | 21.1 |
| BH 76/18-48  | - | - | 2013 | raccoon | organ grinding | 24.2 | 24.3 | 23.9 |
| BH 76/18-49  | - | - | 2013 | raccoon | organ grinding | 26.8 | 27.4 | 26.1 |
| BH 76/18-50  | - | - | 2013 | raccoon | organ grinding | 32.1 | 32.2 | 31.6 |
| BH 76/18-56  | - | - | 2013 | raccoon | organ grinding | 17.0 | 18.0 | 15.9 |
| BH 76/18-52  | - | - | 2013 | raccoon | organ grinding | 20.7 | 21.1 | 19.8 |
| BH 76/18-53  | - | - | 2013 | raccoon | organ grinding | 22.7 | 23.7 | 22.4 |
| BH 76/18-54  | - | - | 2013 | raccoon | organ grinding | 21.8 | 22.3 | 21.1 |
| BH 76/18-57  | - | - | 2013 | raccoon | organ grinding | 19.1 | 21.0 | 18.9 |
| BH 76/18-58  | - | - | 2013 | raccoon | organ grinding | 20.2 | 21.1 | 18.7 |
| BH 76/18-59  | - | - | 2013 | raccoon | organ grinding | 18.3 | 19.3 | 17.4 |
| BH 76/18-60  | - | - | 2013 | raccoon | organ grinding | 21.2 | 22.0 | 19.4 |
| BH 76/18-62  | - | - | 2013 | raccoon | organ grinding | 20.2 | 20.6 | 18.5 |
| BH 76/18-63  | - | - | 2013 | raccoon | organ grinding | 17.8 | 18.7 | 21.5 |



|              |   |   |      |             |                |      |      |      |
|--------------|---|---|------|-------------|----------------|------|------|------|
| BH 76/18-40  | - | - | 2013 | raccoon     | organ grinding | 24.6 | 26.4 | 23.5 |
| BH 76/18-36  | - | - | 2013 | raccoon     | organ grinding | 25.9 | 27.7 | 24.9 |
| BH 76/18-31  | - | - | 2013 | raccoon     | organ grinding | 19.4 | 20.6 | 18.8 |
| BH 76/18-32  | - | - | 2013 | raccoon     | organ grinding | 21.1 | 21.8 | 20.4 |
| BH 76/18-33  | - | - | 2013 | raccoon     | organ grinding | 19.6 | 20.0 | 17.6 |
| BH 76/18-34  | - | - | 2013 | raccoon     | organ grinding | 18.5 | 20.0 | 16.7 |
| BH 76/18-35  | - | - | 2013 | raccoon     | organ grinding | 21.1 | 21.6 | 20.3 |
| BH 76/18-26  | - | - | 2013 | raccoon     | organ grinding | 21.0 | 22.1 | 19.9 |
| BH 76/18-27  | - | - | 2013 | raccoon     | organ grinding | 21.1 | 21.3 | 19.5 |
| BH 76/18-39  | - | - | 2013 | raccoon     | organ grinding | 21.6 | 23.0 | 20.7 |
| BH 76/18-85  | - | - | 2018 | raccoon     | organ grinding | 28.1 | 27.9 | 25.5 |
| BH 76/18-86  | - | - | 2016 | raccoon     | organ grinding | 22.6 | 24.7 | 21.7 |
| BH 76/18-89  | - | - | 2016 | raccoon     | organ grinding | 24.9 | 25.3 | 24.4 |
| BH 76/18-96  | - | - | 2016 | raccoon     | organ grinding | 28.7 | 29.0 | 28.4 |
| BH 76/18-144 | - | - | 2018 | raccoon     | brain          | 32.5 | 33.8 | 33.2 |
| BH 76/18-154 | - | - | 2018 | raccoon     | brain          | 38.6 | 37.7 | 39.3 |
| BH 76/18-204 | - | - | 2018 | raccoon     | brain          | 37.5 | 36.5 | 37.0 |
| BH 76/18-206 | - | - | 2018 | raccoon     | brain          | 37.3 | 38.4 | 36.8 |
| BH 76/18-19  | - | - | 2012 | raccoon dog | brain          | 26.8 | 27.2 | 27.0 |
| BH 76/18-51  | - | - | 2013 | raccoon dog | brain          | 24.0 | 24.0 | 24.9 |
| BH 76/18-12  | - | - | 2012 | raccoon dog | organ grinding | 25.0 | 25.0 | 24.6 |
| BH 76/18-20  | - | - | 2012 | badger      | organ grinding | 26.3 | 26.6 | 25.9 |
| BH 76/18-68  | - | - | 2013 | badger      | organ grinding | 26.2 | 26.5 | 25.5 |
| BH 76/18-100 | - | - | 2010 | badger      | organ grinding | 25.6 | 27.3 | 25.1 |
| BH 76/18-101 | - | - | 2010 | badger      | organ grinding | 26.4 | 28.5 | 26.0 |
| BH 76/18-42  | - | - | 2013 | Wolf        | organ grinding | 34.5 | 34.7 | 36.7 |
| BH 76/18-43  | - | - | 2013 | Wolf        | organ grinding | 32.5 | 34.4 | 32.6 |
| BH 76/18-67  | - | - | 2013 | marten      | organ grinding | 23.2 | 24.3 | 22.3 |
| BH 76/18-99  | - | - | 2010 | marten      | organ grinding | 24.8 | 26.5 | 23.6 |
| BH 76/18-102 | - | - | 2010 | marten      | organ grinding | 19.3 | 22.1 | 19.1 |
| BH 76/18-37  | - | - | 2013 | marten      | brain          | 21.5 | 22.0 | 22.1 |
| BH 76/18-64  | - | - | 2013 | dog         | organ grinding | 37.6 | 35.4 | 35.8 |

RT-qPCR = reverse transcriptase quantitative polymerase chain reaction, CDV = canine distemper virus, ID = ident number; Cq = quantification cyler;

FFPE = formalin-fixed paraffin-embedded; \* year of isolation
